# Supplementary material for: Dinuclear palladium–azido complexes containing thiophene derivatives: reactivity toward organic isocyanides and isothiocyanates
Source: Royal Society of Chemistry journal article supplement (doi:10.1039/b616901e), 2007-01-01
Supplement: b616901e.pdf [file b616901e.pdf]

## Supporting Information

### Dinuclear palladium–azido complexes containing thiophene derivatives: reactivity toward organic isocyanides and isothiocyanates

Xiaohong Chang<sup>a,b</sup>, Mi-Young Kim<sup>a</sup>, Yong-Joo Kim,<sup>\*a</sup> Hyun Sue Huh<sup>c</sup> and Soon W. Lee<sup>c</sup>

<sup>a</sup>Department of Chemistry, Kangnung National University, Kangnung 210-702, Korea

<sup>b</sup>Department of Chemistry, Liaoning University, Shenyang 110036, PR China

<sup>c</sup>Department of Chemistry, Sungkyunkwan University, Natural Science Campus, Suwon 440-746, Korea

### Experimental

Data for **3**:  $\delta_{\text{H}}$  (CDCl<sub>3</sub>): 1.22 (36 H, s, P(CH<sub>3</sub>)<sub>3</sub>), 7.12 (2 H, br), 7.19 (2 H, s), 7.72 (2 H, br), 8.57 (2 H, d,  $J = 4.2$  Hz), 9.27 (2 H, d,  $J = 7.3$  Hz);  $\delta_{\text{P}}$  (CDCl<sub>3</sub>): -17.01 (s).

Data for **4**:  $\delta_{\text{H}}$  (CDCl<sub>3</sub>): 1.05 (36 H, qnt,  $J = 7.7$  Hz, P(CH<sub>2</sub>CH<sub>3</sub>)<sub>3</sub>), 1.60 (24 H, br, P(CH<sub>2</sub>CH<sub>3</sub>)<sub>3</sub>), 7.11 (2 H, m), 7.22 (2 H, s), 7.68 (2 H, m), 8.58 (2 H, br), 9.43 (2 H, br);  $\delta_{\text{P}}$  (CDCl<sub>3</sub>): 14.06 (s).

Data for **5**:  $\delta_{\text{H}}$  (CDCl<sub>3</sub>): 1.22 (36 H, s, P(CH<sub>3</sub>)<sub>3</sub>), 7.10 (2 H, dd,  $J = 1.1, 4.8$  Hz), 7.11 (2 H, s), 7.72 (2 H, dd,  $J = 1.8, 7.8$  Hz), 8.57 (2 H, m), 9.03 (2 H, d,  $J = 7.7$  Hz);  $\delta_{\text{C}}$  (CDCl<sub>3</sub>): 13.6 (s, P(CH<sub>3</sub>)<sub>3</sub>), 118.1, 120.8, 130.8, 136.2, 138.4, 138.6, 145.1, 149.5, 154.6;  $\delta_{\text{P}}$  (CDCl<sub>3</sub>): -14.19 (s).

Data for **6**: 2037 (vs);  $\delta_{\text{H}}$  (CDCl<sub>3</sub>): 1.08 (36 H, br, P(CH<sub>2</sub>CH<sub>3</sub>)<sub>3</sub>), 1.56 (24 H, br, P(CH<sub>2</sub>CH<sub>3</sub>)<sub>3</sub>), 7.09 (2 H, dd,  $J = 1.1, 5.0$  Hz), 7.14 (2H, s), 7.66 (2 H, dd,  $J = 1.8, 7.5$

Hz), 8.56 (2 H, m), 9.19 (2 H, br);  $\delta_{\text{C}}$  ( $\text{CDCl}_3$ ): 8.0 (s,  $\text{P}(\text{CH}_2\text{CH}_3)_3$ ), 14.7 (br,  $\text{P}(\text{CH}_2\text{CH}_3)_3$ ), 119.0, 120.8, 131.6, 135.9, 138.1, 138.5, 144.6, 149.4, 154.9;  $\delta_{\text{P}}$  ( $\text{CDCl}_3$ ): -14.70 (s).

Data for **7**:  $\delta_{\text{H}}$  ( $\text{CDCl}_3$ ): 1.23 (36 H, s,  $\text{P}(\text{CH}_3)_3$ ), 7.11 (2 H, dd,  $J = 1.0, 5.0$  Hz), 7.15 (2 H, s), 7.17 (2 H, s), 7.70 (2 H, dd,  $J = 1.8, 8.0$  Hz), 8.56 (2 H, m), 9.24 (2 H, d,  $J = 8.0$  Hz);  $\delta_{\text{P}}$  ( $\text{CDCl}_3$ ): -14.65 (s).

Data for **8**:  $\delta_{\text{H}}$  ( $\text{CDCl}_3$ ): 1.22 (36H, s,  $\text{P}(\text{CH}_3)_3$ ), 7.10 (2 H, s), 7.11 (2 H, dd,  $J = 1.1, 4.9$  Hz), 7.16 (2 H, s), 7.71 (2 H, dd,  $J = 1.8, 8.0$  Hz), 8.56 (2 H, m), 9.01 (2 H, d,  $J = 8$  Hz);  $\delta_{\text{C}}$  ( $\text{CDCl}_3$ ): 13.8 (s,  $\text{P}(\text{CH}_3)_3$ ), 118.3, 121.1, 124.8, 130.5, 136.5, 136.7, 138.3, 139.0, 145.4, 149.7, 154.7;  $\delta_{\text{P}}$  ( $\text{CDCl}_3$ ): -14.21 (s).

Data for **9**:  $\delta_{\text{H}}$  ( $\text{CDCl}_3$ ): 1.80 (18 H, d,  $J = 11$  Hz,  $\text{P}(\text{CH}_3)_3$ ), 7.01 (2 H, d,  $J = 1.8$  Hz), 7.13 (4 H, m), 7.32 (2 H, m), 7.72 (2 H, dd,  $J = 1.7, 7.7$  Hz), 8.57 (2 H, m), 9.22 (2 H, m);  $\delta_{\text{P}}$  ( $\text{CDCl}_3$ ): -3.97 (s).

Data for **10**:  $\delta_{\text{H}}$  ( $\text{CDCl}_3$ ): 1.80 (18 H, d,  $J = 11$  Hz,  $\text{P}(\text{CH}_3)_3$ ), 6.95 (2 H, d,  $J = 1.7$  Hz), 7.14 (4 H, overlap), 7.34 (2 H, dq,  $J = 1.0, 7.9$  Hz), 7.77 (2 H, dd,  $J = 1.7, 7.7$  Hz), 8.76 (2 H, m);  $\delta_{\text{C}}$  ( $\text{CDCl}_3$ ): 15.9 (d,  $J(\text{CP}) = 33$  Hz,  $\text{P}(\text{CH}_3)_3$ ), 117.5, 120.5 (d,  $J(\text{CP}) = 3.1$  Hz), 125.1, 129.9, 130.1, 136.4, 138.3, 139.7, 148.7, 155.7, 158.7;  $\delta_{\text{P}}$  ( $\text{CDCl}_3$ ): -4.10(s).

Data for **11**:  $\delta_{\text{H}}$  ( $\text{CDCl}_3$ ): 1.19 (36 H, s,  $\text{P}(\text{CH}_3)_3$ ), 2.43 (12 H, s,  $\text{CH}_3$ ), 6.71 (2 H, t,  $J = 7.3$  Hz, -Ph), 6.95 (4 H, d,  $J = 7.5$  Hz, -Ph), 7.11 (2 H, dd,  $J = 1.1, 4.8$  Hz), 7.15 (2 H, s), 7.71 (2 H, dd,  $J = 1.8, 7.5$  Hz), 8.56 (2 H, m), 9.13 (2 H, d,  $J = 7.6$  Hz);  $\delta_{\text{C}}$  ( $\text{CDCl}_3$ ): 14.0 (br,  $\text{P}(\text{CH}_3)_3$ ), 19.4 ( $\text{CH}_3$ ), 118.2, 119.6, 120.8, 127.8, 131.0, 131.2, 136.2, 138.7, 144.8, 149.5, 154.9;  $\delta_{\text{P}}$  ( $\text{CDCl}_3$ ): -14.63 (s).

Data for **12**:  $\delta_{\text{H}}$  ( $\text{CDCl}_3$ ): 1.19 (36 H, s,  $\text{P}(\text{CH}_3)_3$ ), 1.30 (24 H, d,  $J = 6.9$  Hz,

$\text{CH}(\text{CH}_3)_2$ , 3.73 (4 H, sep,  $J = 6.9$  Hz,  $\text{CH}(\text{CH}_3)_2$ ), 6.92 (2 H, dd,  $J = 6.9, 8.3$  Hz, –Ph), 7.06 (4 H, d,  $J = 7.5$  Hz, –Ph), 7.10 (2 H, dd,  $J = 1.0, 4.9$  Hz), 7.13 (2 H, s), 7.68 (2 H, dd,  $J = 1.8, 7.5$  Hz), 8.56 (2 H, m), 9.14 (2 H, br);  $\delta_{\text{C}}$  ( $\text{CDCl}_3$ ): 14.1 (br,  $\text{P}(\text{CH}_3)_3$ ), 23.6 ( $\text{CH}(\text{CH}_3)_2$ ), 28.4 ( $\text{CH}(\text{CH}_3)_2$ ), 118.2, 120.7, 120.8, 122.5, 131.3, 136.2, 138.7, 138.8, 141.8, 142.0, 149.5, 155.0;  $\delta_{\text{P}}$  ( $\text{CDCl}_3$ ): –14.68 (s).

Data for **13**:  $\delta_{\text{H}}$  ( $\text{CDCl}_3$ ): 1.20 (36 H, s,  $\text{P}(\text{CH}_3)_3$ ), 2.43 (12 H, s,  $\text{CH}_3$ ), 6.71 (2 H, t,  $J = 7.3$  Hz, –Ph), 6.95 (4 H, d,  $J = 7.5$  Hz, –Ph), 7.11 (2 H, dd,  $J = 1.1, 4.8$  Hz), 7.13 (4 H, d,  $J = 12$  Hz), 7.70 (2 H, dd,  $J = 1.8, 7.5$  Hz), 8.56 (2 H, m), 9.11 (2 H, d,  $J = 7.9$  Hz);  $\delta_{\text{C}}$  ( $\text{CDCl}_3$ ): 14.1 (br,  $\text{P}(\text{CH}_3)_3$ ), 19.5 ( $\text{CH}_3$ ), 118.2, 119.6, 120.9, 124.6, 127.8, 130.6, 130.9, 136.2, 136.6, 138.1, 139.1, 144.8, 146.1, 149.5, 154.8;  $\delta_{\text{P}}$  ( $\text{CDCl}_3$ ): –14.63 (s).

Data for **14**: 2115 (vs);  $\delta_{\text{H}}$  ( $\text{CDCl}_3$ ): 1.19 (36 H, s,  $\text{P}(\text{CH}_3)_3$ ), 1.30 (24 H, d,  $J = 7.0$  Hz,  $\text{CH}(\text{CH}_3)_2$ ), 3.75 (4 H, sep,  $J = 7.0$  Hz,  $\text{CH}(\text{CH}_3)_2$ ), 6.91 (2 H, dd,  $J = 7.0$  Hz, –Ph), 7.06 (4 H, d,  $J = 7$  Hz, –Ph), 7.10 (4 H, m), 7.11 (2 H, d,  $J = 7.0$  Hz), 7.68 (2 H, dd,  $J = 1.7, 4.0$  Hz), 8.55 (2 H, d,  $J = 4.0$  Hz), 9.12 (2 H, d,  $J = 7.5$  Hz);  $\delta_{\text{C}}$  ( $\text{CDCl}_3$ ): 14.1 (br,  $\text{P}(\text{CH}_3)_3$ ), 23.6 ( $\text{CH}(\text{CH}_3)_2$ ), 28.4 ( $\text{CH}(\text{CH}_3)_2$ ), 118.2, 120.6, 120.9, 122.5, 124.6, 130.2, 130.6, 136.1, 136.6, 138.1, 139.2, 141.8, 142.0, 149.5, 154.8;  $\delta_{\text{P}}$  ( $\text{CDCl}_3$ ): –14.72 (s).

Data for **15**:  $\delta_{\text{H}}$  ( $\text{CDCl}_3$ ): 1.25 (24 H, d,  $J = 6.8$  Hz,  $\text{CH}(\text{CH}_3)_2$ ), 1.76 (18 H, d,  $J = 11$  Hz,  $\text{P}(\text{CH}_3)_3$ ), 3.73 (4 H, sep,  $J = 6.9$  Hz,  $\text{CH}(\text{CH}_3)_2$ ), 6.91 (2 H, dd,  $J = 6.8, 8.2$  Hz, –Ph), 6.99 (2 H, d,  $J = 1.7$  Hz, –Ph), 7.04 (4 H, d,  $J = 7.4$  Hz), 7.07–7.09 (2H, m, –Ph), 7.34 (2 H, m), 7.74 (2 H, dd,  $J = 1.7, 7.7$  Hz), 8.81 (2 H, m);  $\delta_{\text{C}}$  ( $\text{CDCl}_3$ ): 16.5 (d,  $J(\text{CP}) = 33$  Hz  $\text{P}(\text{CH}_3)_3$ ), 23.6 ( $\text{CH}(\text{CH}_3)_2$ ), 28.3 ( $\text{CH}(\text{CH}_3)_2$ ), 117.3 (d,  $J(\text{CP}) = 2.5$  Hz), 120.3, 120.4, 120.8, 122.6, 130.8 (d,  $J = 8.7$  Hz), 139.5, 141.5, 141.9, 149.2, 158.8 (d,  $J(\text{CP}) = 2.5$  Hz);  $\delta_{\text{P}}$  ( $\text{CDCl}_3$ ): –3.66 (s).

Data for **16**:  $\delta_{\text{H}}$  ( $\text{CDCl}_3$ ): 1.26 (24 H, d,  $J = 7.0$  Hz,  $\text{CH}(\text{CH}_3)_2$ ), 1.77 (18 H, d,  $J = 11$  Hz,  $\text{P}(\text{CH}_3)_3$ ), 3.74 (4 H, sep,  $J = 6.9$  Hz,  $\text{CH}(\text{CH}_3)_2$ ), 6.90 (2 H, dd,  $J = 6.8, 8.2$  Hz, -Ph), 6.97 (2 H, d,  $J = 1.5$  Hz, -Ph), 7.03–7.08 (6H, overlap), 7.14 (2 H, s), 7.33 (2 H, dd,  $J = 1.0, 8.0$  Hz), 7.74 (2 H, dd,  $J = 1.7, 7.7$  Hz), 8.80 (2 H, m);  $\delta_{\text{C}}$  ( $\text{CDCl}_3$ ): 16.6 (d,  $J(\text{CP}) = 33$  Hz  $\text{P}(\text{CH}_3)_3$ ), 23.6 ( $\text{CH}(\text{CH}_3)_2$ ), 28.4 ( $\text{CH}(\text{CH}_3)_2$ ), 117.4 (d,  $J(\text{CP}) = 1.9$  Hz), 120.3 (d,  $J(\text{CP}) = 3.7$  Hz), 120.8, 122.6, 125.0, 130.2 (d,  $J(\text{CP}) = 8.1$  Hz), 130.5 (d,  $J(\text{CP}) = 2.5$  Hz), 136.4, 138.2 (d,  $J(\text{CP}) = 4.3$  Hz), 139.5, 141.9, 142.1 (d,  $J(\text{CP}) = 2.5$  Hz), 149.1, 156.7 (d,  $J(\text{CP}) = 10$  Hz), 158.9 (d,  $J(\text{CP}) = 3.1$  Hz);  $\delta_{\text{P}}$  ( $\text{CDCl}_3$ ): -3.59 (s)

Data for **17**:  $\delta_{\text{H}}$  ( $\text{CD}_2\text{Cl}_2$ ): 1.10 (36 H, s,  $\text{P}(\text{CH}_3)_3$ ), 1.57 (12 H, d,  $J = 6.7$  Hz,  $\text{CH}(\text{CH}_3)_2$ ), 5.02 (2 H, sep,  $J = 6.8$  Hz,  $\text{CH}(\text{CH}_3)_2$ ), 7.11 (2 H, dd,  $J = 1.0, 4.9$  Hz), 7.24 (2 H, s), 7.93 (2 H, dd,  $J = 1.8, 6.3$  Hz), 8.54 (2 H, m), 9.80 (2 H, br);  $\delta_{\text{C}}$  ( $\text{CD}_2\text{Cl}_2$ ): 14.1 (t,  $J = 14$  Hz,  $\text{P}(\text{CH}_3)_3$ ), 21.9 ( $\text{CH}(\text{CH}_3)_2$ ), 49.9 ( $\text{CH}(\text{CH}_3)_2$ ), 120.7, 121.1, 131.5, 137.1, 139.0, 140.2, 149.2, 155.2;  $\delta_{\text{P}}$  ( $\text{CD}_2\text{Cl}_2$ ): -15.24 (s).

Data for **18**:  $\delta_{\text{H}}$  ( $\text{CDCl}_3$ ): 1.11 (36 H, s,  $\text{P}(\text{CH}_3)_3$ ), 1.53 (6 H, t,  $J = 7.2$  Hz,  $\text{CH}_2\text{CH}_3$ ), 4.40 (4 H, q,  $J = 7.2$  Hz,  $\text{CH}_2\text{CH}_3$ ), 7.11 (2 H, dd,  $J = 1.0, 4.9$  Hz), 7.24 (2 H, s), 7.93 (2 H, dd,  $J = 1.8, 8.0$  Hz), 8.54 (2 H, br), 9.77 (2 H, br);  $\delta_{\text{C}}$  ( $\text{CDCl}_3$ ): 14.1 (t,  $J = 16$  Hz,  $\text{P}(\text{CH}_3)_3$ ), 14.3 ( $\text{CH}_2\text{CH}_3$ ), 42.2 ( $\text{CH}_2\text{CH}_3$ ), 120.5 (br), 121.0, 131.3 (br), 137.1, 138.6, 139.7 (br), 149.1, 154.6;  $\delta_{\text{P}}$  ( $\text{CDCl}_3$ ): -15.25 (s).

Data for **19**:  $\delta_{\text{H}}$  ( $\text{CDCl}_3$ ): 1.11 (36 H, s,  $\text{P}(\text{CH}_3)_3$ ), 4.97 (4 H, m,  $\text{CH}_2\text{CH}=\text{CH}_2$ ), 5.28 (4 H, m,  $\text{CH}_2\text{CH}=\text{CH}_2$ ), 6.05 (2 H, m,  $\text{CH}_2\text{CH}=\text{CH}_2$ ), 7.11 (2 H, dd,  $J = 1.0, 4.9$  Hz), 7.18 (2 H, s), 7.21 (2 H, s), 7.90 (2 H, dd,  $J = 1.8, 8.0$  Hz), 8.54 (2 H, m), 9.68 (2 H, br);  $\delta_{\text{C}}$  ( $\text{CDCl}_3$ ): 14.1 (t,  $J = 15$  Hz,  $\text{P}(\text{CH}_3)_3$ ), 49.7 ( $\text{CH}_2\text{CH}=\text{CH}_2$ ), 118.9 ( $\text{CH}_2\text{CH}=\text{CH}_2$ ), 120.3, 121.1, 124.5, 130.6, 131.1 ( $\text{CH}_2\text{CH}=\text{CH}_2$ ), 136.7, 137.0, 137.9, 149.2;  $\delta_{\text{P}}$  ( $\text{CDCl}_3$ ): -15.29 (s).

Data for **20**:  $\delta_{\text{H}}$  ( $\text{CDCl}_3$ ): 1.29 (36 H, t,  $J = 3.7$  Hz,  $\text{P}(\text{CH}_3)_3$ ), 6.45 (2 H, d,  $J = 3.5$  Hz), 6.95 (2 H, d,  $J = 3.5$  Hz);  $\delta_{\text{C}}$  ( $\text{CDCl}_3$ ): 13.4 (t,  $J(\text{CP}) = 15$  Hz,  $\text{P}(\text{CH}_3)_3$ ), 122.6, 129.3 (t,  $J(\text{CP}) = 5.0$  Hz), 139.9 (t,  $J(\text{CP}) = 11$  Hz), 141.0 (m);  $\delta_{\text{P}}$  ( $\text{CDCl}_3$ ): -15.11 (s).

Data for **21**:  $\delta_{\text{H}}$  ( $\text{CDCl}_3$ ): 1.27 (36 H, t,  $J = 3.7$  Hz,  $\text{P}(\text{CH}_3)_3$ ), 6.51 (2 H, d,  $J = 3.3$  Hz), 6.89 (2 H, s), 7.07 (2 H, d,  $J = 3.5$  Hz);  $\delta_{\text{C}}$  ( $\text{CDCl}_3$ ): 13.3 (t,  $J(\text{CP}) = 15$  Hz,  $\text{P}(\text{CH}_3)_3$ ), 122.1, 124.0, 129.7 (t,  $J(\text{CP}) = 5.0$  Hz), 135.9, 139.5 (t,  $J(\text{CP}) = 3.1$  Hz), 143.0 (t,  $J(\text{CP}) = 11$  Hz);  $\delta_{\text{P}}$  ( $\text{CDCl}_3$ ): -14.87 (s).

Data for **22**:  $\delta_{\text{H}}$  ( $\text{CDCl}_3$ ): 1.52 (24 H, t,  $J = 3.5$  Hz,  $\text{P}(\text{CH}_3)_2\text{Ph}$ ), 6.09 (2 H, d,  $J = 3.5$  Hz), 6.76 (2 H, s), 6.88 (2 H, d,  $J = 3.5$  Hz), 7.35–7.40 (12 H, m), 7.57–7.64 (8 H, m);  $\delta_{\text{C}}$  ( $\text{CDCl}_3$ ): 12.4 (t,  $J(\text{CP}) = 15$  Hz,  $\text{P}(\text{CH}_3)_2\text{Ph}$ ), 122.1, 123.9, 128.4 (t,  $J(\text{CP}) = 4.7$  Hz), 129.8, 130.1, 131.1 (t,  $J(\text{CP}) = 5.9$  Hz), 134.0 (t,  $J(\text{CP}) = 22$  Hz), 135.6, 135.9, 139.9, 142.3 (t,  $J(\text{CP}) = 11$  Hz);  $\delta_{\text{P}}$  ( $\text{CDCl}_3$ ): -6.60 (s).

Data for **23**:  $\delta_{\text{H}}$  ( $\text{CDCl}_3$ ): 1.29 (36 H, t,  $J = 3.5$  Hz,  $\text{P}(\text{CH}_3)_3$ ), 6.42 (2 H, d,  $J = 3.5$  Hz), 6.95 (2 H, d,  $J = 3.3$  Hz);  $\delta_{\text{C}}$  ( $\text{CDCl}_3$ ): 13.1 (t,  $J(\text{CP}) = 15$  Hz,  $\text{P}(\text{CH}_3)_3$ ), 122.7, 129.5 (t,  $J(\text{CP}) = 5.0$  Hz), 138.3 (t,  $J(\text{CP}) = 12$  Hz), 141.1;  $\delta_{\text{P}}$  ( $\text{CDCl}_3$ ): -14.26 (s).

Data for **24**:  $\delta_{\text{H}}$  ( $\text{CDCl}_3$ ): 1.28 (36 H, t,  $J = 3.5$  Hz,  $\text{P}(\text{CH}_3)_3$ ), 6.48 (2 H, d,  $J = 3.5$  Hz), 6.89 (2 H, s), 7.06 (2 H, d,  $J = 3.5$  Hz);  $\delta_{\text{C}}$  ( $\text{CDCl}_3$ ): 13.0 (t,  $J(\text{CP}) = 15$  Hz,  $\text{P}(\text{CH}_3)_3$ ), 121.2, 124.0, 129.8 (t,  $J(\text{CP}) = 4.3$  Hz), 135.8, 139.6 (t,  $J(\text{CP}) = 3.2$  Hz), 141.3 (t,  $J(\text{CP}) = 11$  Hz);  $\delta_{\text{P}}$  ( $\text{CDCl}_3$ ): -14.10 (s).

Data for **25**:  $\delta_{\text{H}}$  ( $\text{CDCl}_3$ ): 1.52 (24 H, t,  $J = 3.4$  Hz,  $\text{P}(\text{CH}_3)_2\text{Ph}$ ), 6.10 (2H, d,  $J = 3.5$  Hz), 6.78 (2 H, s), 6.90 (2 H, d,  $J = 3.5$  Hz), 7.38–7.44 (12 H, m, Ph), 7.53–7.60 (8 H, m, Ph);  $\delta_{\text{C}}$  ( $\text{CDCl}_3$ ): 11.9 (t,  $J(\text{CP}) = 15$  Hz,  $\text{P}(\text{CH}_3)_2\text{Ph}$ ), 122.1, 123.9, 128.6 (t,  $J(\text{CP}) = 5.0$  Hz), 129.8, 130.1, 130.8 (t,  $J(\text{CP}) = 5.9$  Hz), 133.0 (t,  $J(\text{CP}) = 22$  Hz), 135.9, 139.9, 140.8 (t,  $J(\text{CP}) = 11$  Hz);  $\delta_{\text{P}}$  ( $\text{CDCl}_3$ ): -5.41 (s).

Data for **26**:  $\delta_{\text{H}}$  ( $\text{CDCl}_3$ ): 1.27 (36 H, t,  $J = 3.5$  Hz,  $\text{P}(\text{CH}_3)_3$ ), 2.38 (12 H, s,  $\text{CH}_3$ ), 6.44 (2 H, d,  $J = 3.5$  Hz), 6.68 (2 H, t,  $J = 7.4$  Hz,  $-\text{Ph}$ ), 6.92 (2 H, d,  $J = 7.4$  Hz,  $-\text{Ph}$ ), 6.95 (2 H, d,  $J = 3.3$  Hz);  $\delta_{\text{C}}$  ( $\text{CDCl}_3$ ): 13.5 (t,  $J = 15$  Hz,  $\text{P}(\text{CH}_3)_3$ ), 19.4 ( $\text{CH}_3$ ), 119.5, 122.6, 127.7, 129.7 (t,  $J = 5.0$  Hz), 131.0, 141.2, 144.6;  $\delta_{\text{P}}$  ( $\text{CDCl}_3$ ):  $-14.87$  (s).

Data for **27**:  $\delta_{\text{H}}$  ( $\text{CDCl}_3$ ): 1.25 (24 H, d,  $J = 6.8$  Hz,  $\text{CH}(\text{CH}_3)_2$ ), 1.26 (36 H, t,  $J = 3.5$  Hz,  $\text{P}(\text{CH}_3)_3$ ), 3.68 (4 H, sep,  $J = 6.8$  Hz,  $\text{CH}(\text{CH}_3)_2$ ), 6.44 (2 H, d,  $J = 3.4$  Hz), 6.68 (2 H, dd,  $J = 6.9, 8.3$  Hz,  $-\text{Ph}$ ), 6.95 (2 H, d,  $J = 3.4$  Hz), 7.02 (4 H, d,  $J = 7.4$  Hz,  $-\text{Ph}$ );  $\delta_{\text{C}}$  ( $\text{CDCl}_3$ ): 13.4 (t,  $J = 15$  Hz,  $\text{P}(\text{CH}_3)_3$ ), 23.5 ( $\text{CH}(\text{CH}_3)_2$ ), 28.3 ( $\text{CH}(\text{CH}_3)_2$ ), 120.6, 122.5, 122.6, 129.7 (t,  $J = 5.0$  Hz), 130.0, 139.0, 141.2, 141.8, 141.9;  $\delta_{\text{P}}$  ( $\text{CDCl}_3$ ):  $-14.99$  (s).

Data for **28**:  $\delta_{\text{H}}$  ( $\text{CDCl}_3$ ): 1.20 (36 H, t,  $J = 3.7$  Hz,  $\text{P}(\text{CH}_3)_3$ ), 4.93 (4 H, dt,  $J = 1.4, 5.9$  Hz,  $\text{CH}_2\text{CH}=\text{CH}_2$ ), 5.21 (1 H, d,  $J = 1.1$  Hz,  $\text{CH}_2\text{CH}=\text{CH}_2$ ), 5.27 (m, 2H,  $\text{CH}_2\text{CH}=\text{CH}_2$ ), 5.30 (1 H, d,  $J = 1.1$  Hz,  $\text{CH}_2\text{CH}=\text{CH}_2$ ), 6.02 (2 H, m,  $\text{CH}_2\text{CH}=\text{CH}_2$ ), 6.60 (2 H, d,  $J = 3.3$  Hz), 7.04 (2 H, d,  $J = 3.5$  Hz);  $\delta_{\text{C}}$  ( $\text{CDCl}_3$ ): 13.6 (t,  $J(\text{CP}) = 15$  Hz,  $\text{P}(\text{CH}_3)_3$ ), 49.1 ( $\text{CH}_2\text{CH}=\text{CH}_2$ ), 118.9 ( $\text{CH}_2\text{CH}=\text{CH}_2$ ), 122.8, 130.1 (t,  $J = 5.0$  Hz), 131.1 ( $\text{CH}_2\text{CH}=\text{CH}_2$ ), 141.5 (t,  $J(\text{CP}) = 2.5$  Hz);  $\delta_{\text{P}}$  ( $\text{CDCl}_3$ ):  $-15.25$  (s).

Data for **29**:  $\delta_{\text{H}}$  ( $\text{CDCl}_3$ ): 1.20 (36 H, t,  $J = 3.7$  Hz,  $\text{P}(\text{CH}_3)_3$ ), 1.49 (6 H, t,  $J = 7.2$  Hz,  $\text{CH}_2\text{CH}_3$ ), 4.36 (4 H, q,  $J = 7.2$  Hz,  $\text{CH}_2\text{CH}_3$ ), 6.61 (2 H, d,  $J = 3.4$  Hz), 7.04 (2 H, d,  $J = 3.3$  Hz);  $\delta_{\text{C}}$  ( $\text{CDCl}_3$ ): 13.6 (t,  $J(\text{CP}) = 15$  Hz,  $\text{P}(\text{CH}_3)_3$ ), 14.2 ( $\text{CH}_2\text{CH}_3$ ), 42.1 ( $\text{CH}_2\text{CH}_3$ ), 122.9, 130.1 (t,  $J(\text{CP}) = 4.7$  Hz);  $\delta_{\text{P}}$  ( $\text{CDCl}_3$ ):  $-15.21$  (s).
